# Supplementary material for: Scalable production of transition metal disulphide/graphite nanoflake composites for high-performance lithium storage
Source: Royal Society of Chemistry journal article supplement (doi:10.1039/c4ra05640j), 2014-08-28
Supplement: c4ra05640j1.pdf [file c4ra05640j1.pdf]

## *Supplementary information*

# Scalable production of transition metal disulphide/graphite nanoflake composites for high-performance lithium storage

Zhi-Qiang Duan <sup>a,1</sup>, Yan-Chun Sun <sup>b,1</sup>, Yi-Tao Liu <sup>a,\*</sup>, Xu-Ming Xie <sup>a,\*</sup>, Xiao-Dong Zhu <sup>c,\*</sup>

<sup>a</sup>*Laboratory of Advanced Materials (Ministry of Education), Department of Chemical Engineering,*

*Tsinghua University, Beijing 100084, China*

<sup>b</sup>*Heilongjiang River Fishery Research Institute, Chinese Academy of Fishery Sciences,*

*Harbin 150070, China*

<sup>c</sup>*Academy of Fundamental and Interdisciplinary Sciences, Harbin Institute of Technology,*

*Harbin 150080, China*

---

\*Corresponding authors. Tel.: +86 10 62773607; fax: +86 10 62784550.

E-mail addresses: liu-yt03@mails.tsinghua.edu.cn (Y.-T. Liu), xxm-dce@mail.tsinghua.edu.cn (X.-M. Xie), zxd9863@163.com (X.-D. Zhu).

<sup>1</sup>These authors contributed equally to this work.

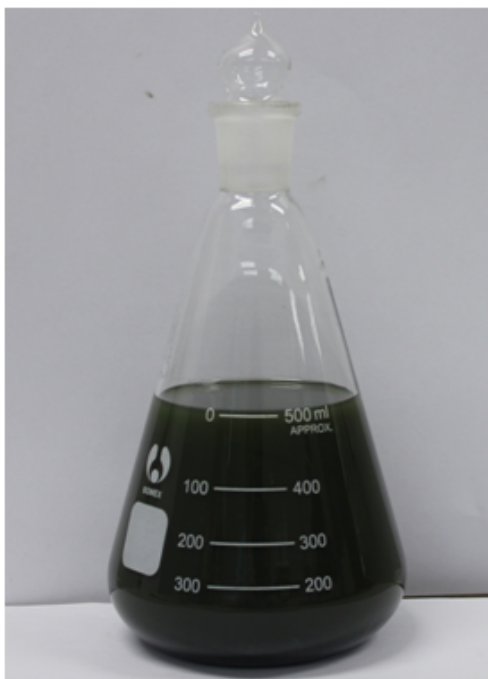

**Fig. S1.** Digital image of a MoS<sub>2</sub> nanoflakes/DMF solution (10 mg mL<sup>-1</sup>) after the ball milling and short-time sonication processes.

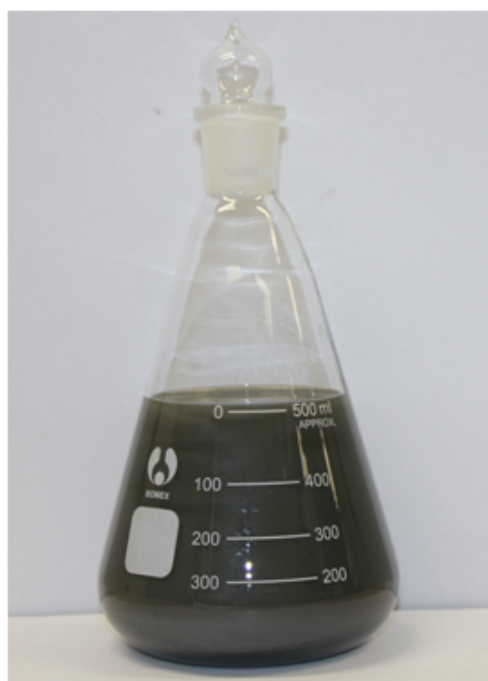

**Fig. S2.** Digital image of a WS<sub>2</sub> nanoflakes/DMF solution (10 mg mL<sup>-1</sup>) after the ball milling and short-time sonication processes.

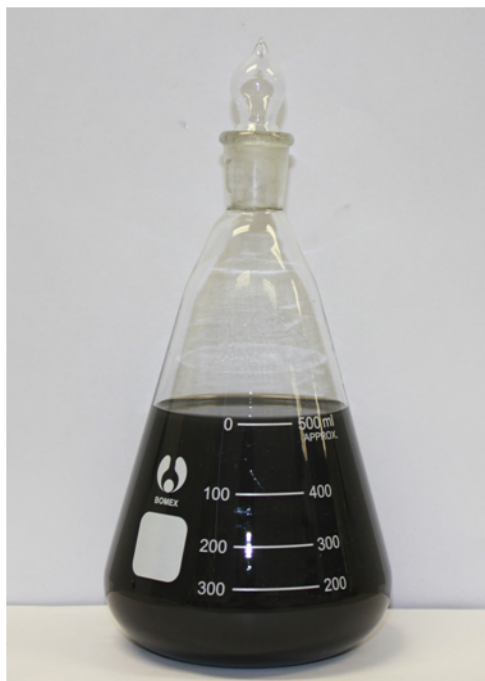

**Fig. S3.** Digital image of a graphite nanoflakes/DMF solution ( $10 \text{ mg mL}^{-1}$ ) after the ball milling and short-time sonication processes.

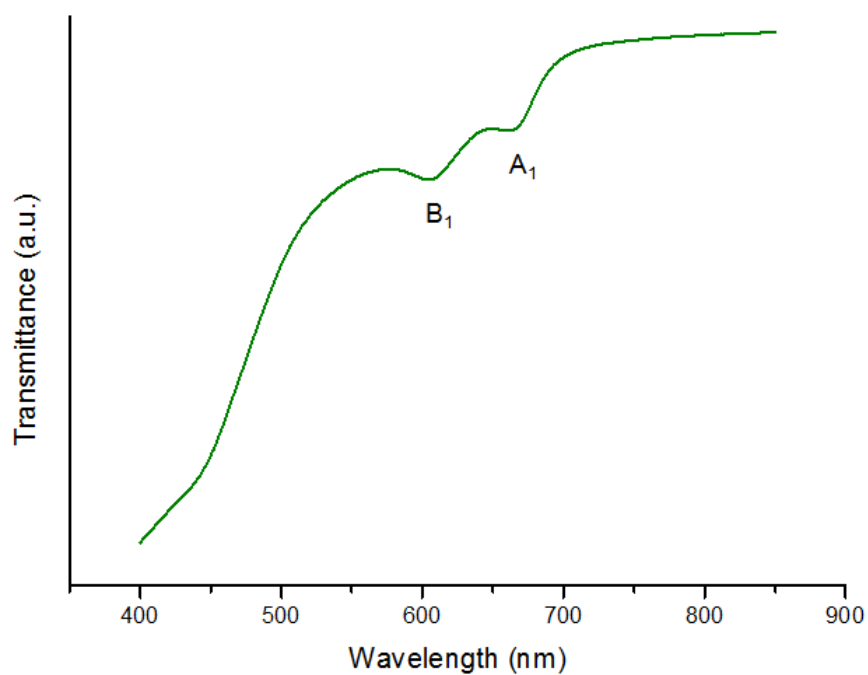

**Fig. S4.** UV/vis spectrum of a  $\text{MoS}_2$  nanoflakes/DMF solution. The spectrum has two characteristic peaks at 674 and 622 nm, respectively, which represent the successful exfoliation of  $\text{MoS}_2$  nanoflakes in DMF.

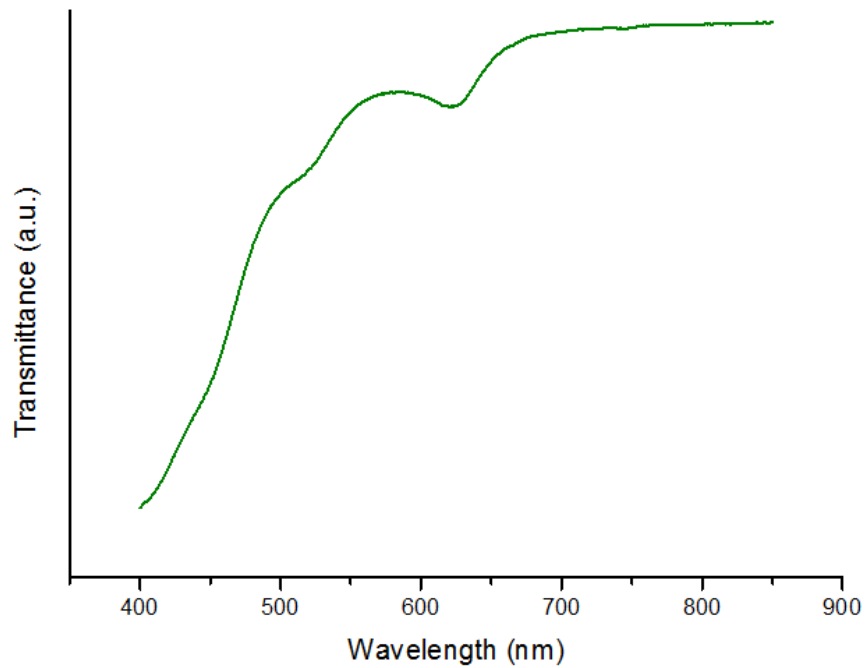

**Fig. S5.** UV/vis spectrum of a WS<sub>2</sub> nanoflakes/DMF solution. The spectrum has one characteristic peak at 621 nm, which represents the successful exfoliation of WS<sub>2</sub> nanoflakes in DMF.

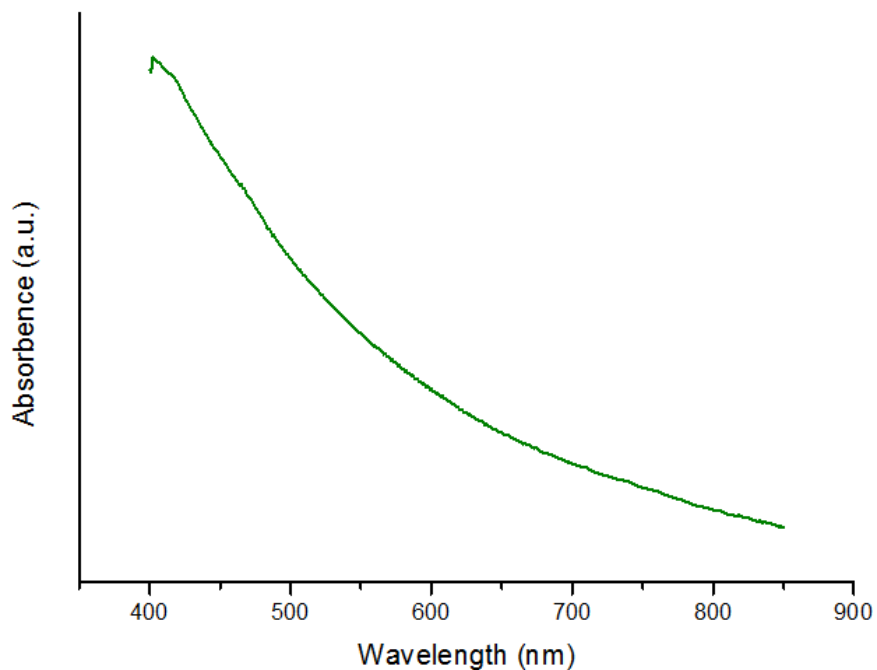

**Fig. S6.** UV/vis spectrum of a graphite nanoflakes/DMF solution. Note that the UV/vis spectrum is featureless within this wavelength range.

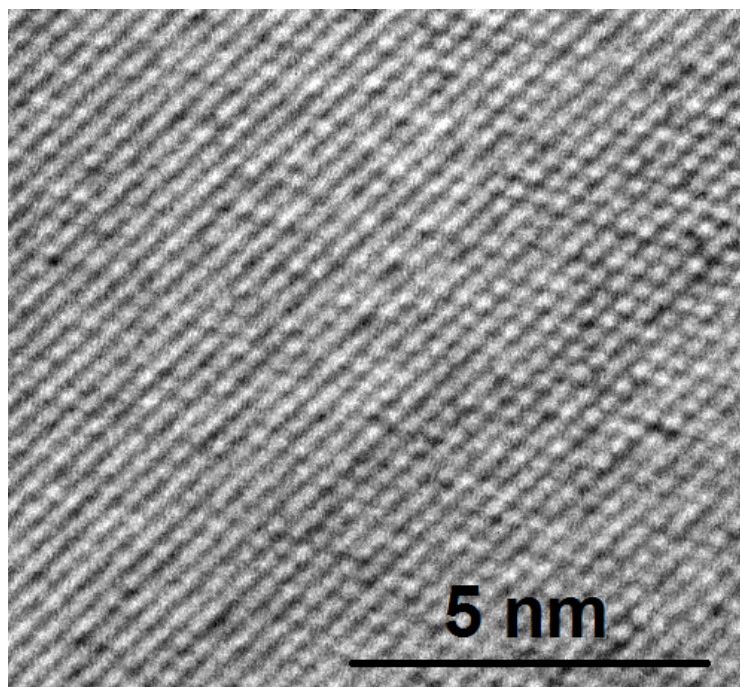

**Fig. S7.** Atomically resolved HRTEM image of a MoS<sub>2</sub> nanoflake showing a high degree of hexagonal symmetry.

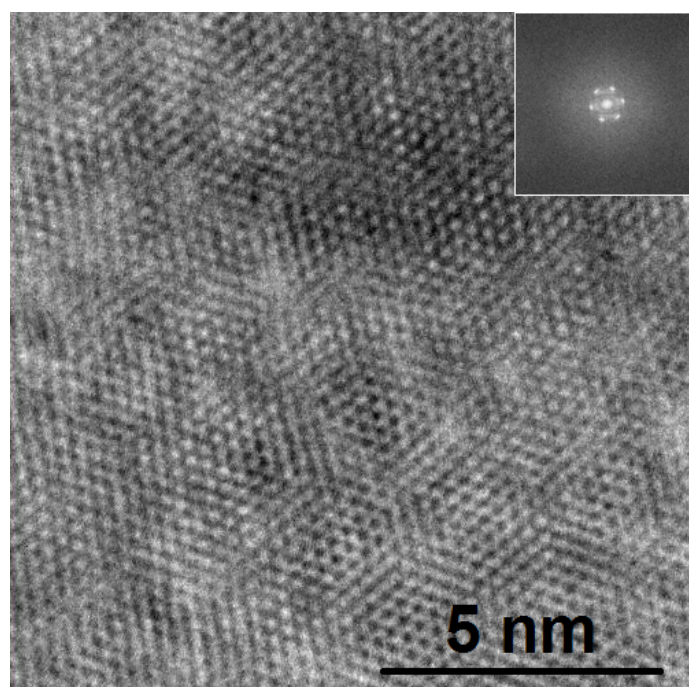

**Fig. S8.** Atomically resolved HRTEM image of a WS<sub>2</sub> nanoflake showing a high degree of hexagonal symmetry.

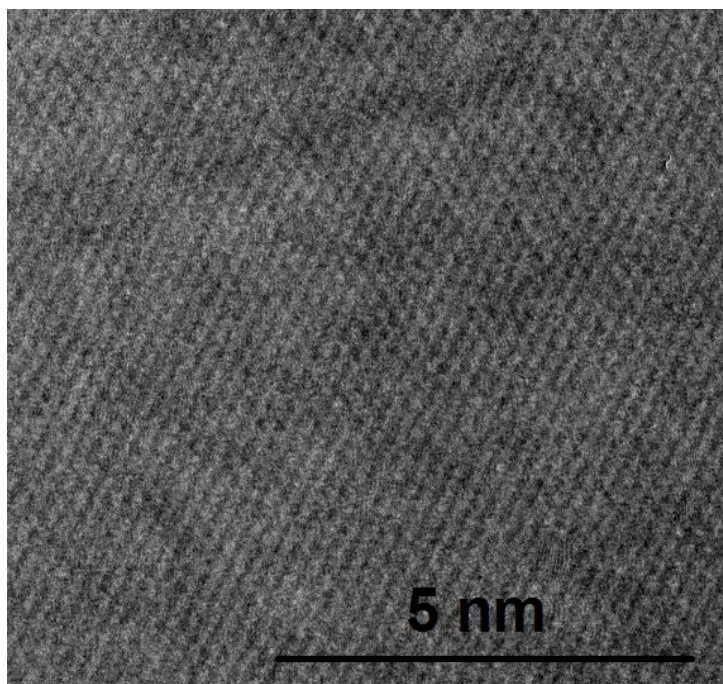

**Fig. S9.** Atomically resolved HRTEM image of a graphite nanoflake showing a high degree of hexagonal symmetry.

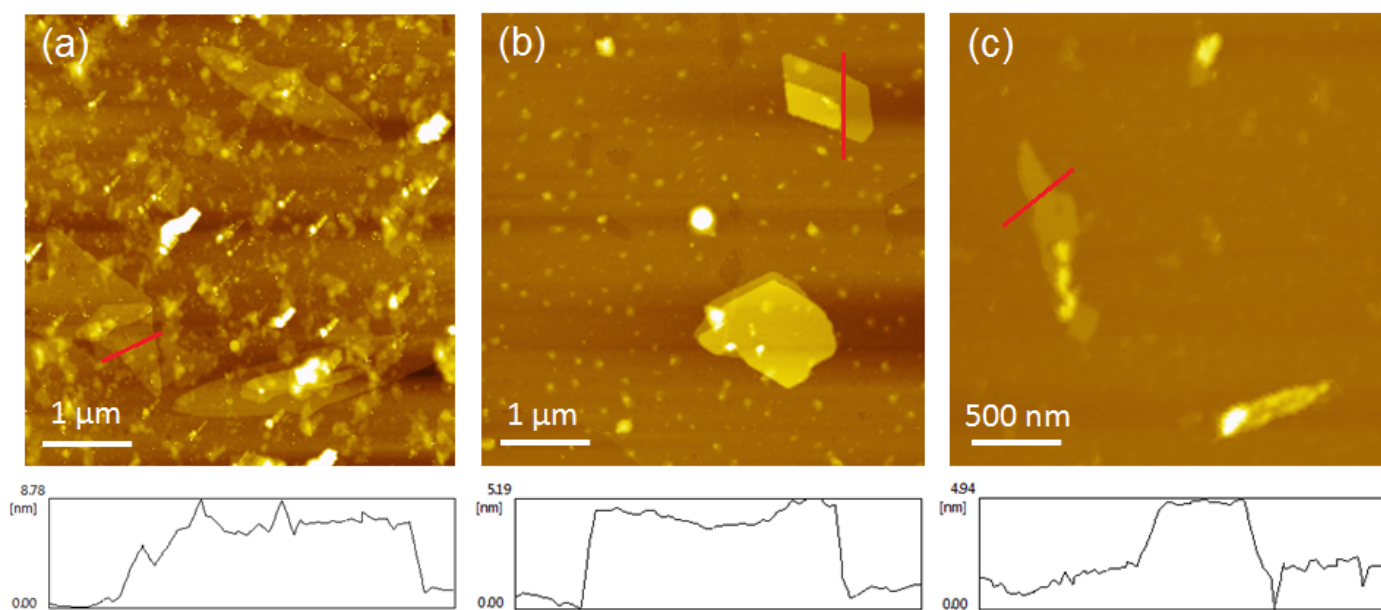

**Fig. S10.** SPM images of (a) graphite, (b) MoS<sub>2</sub> and (c) WS<sub>2</sub> nanoflakes and the height profiles corresponding to the red lines.

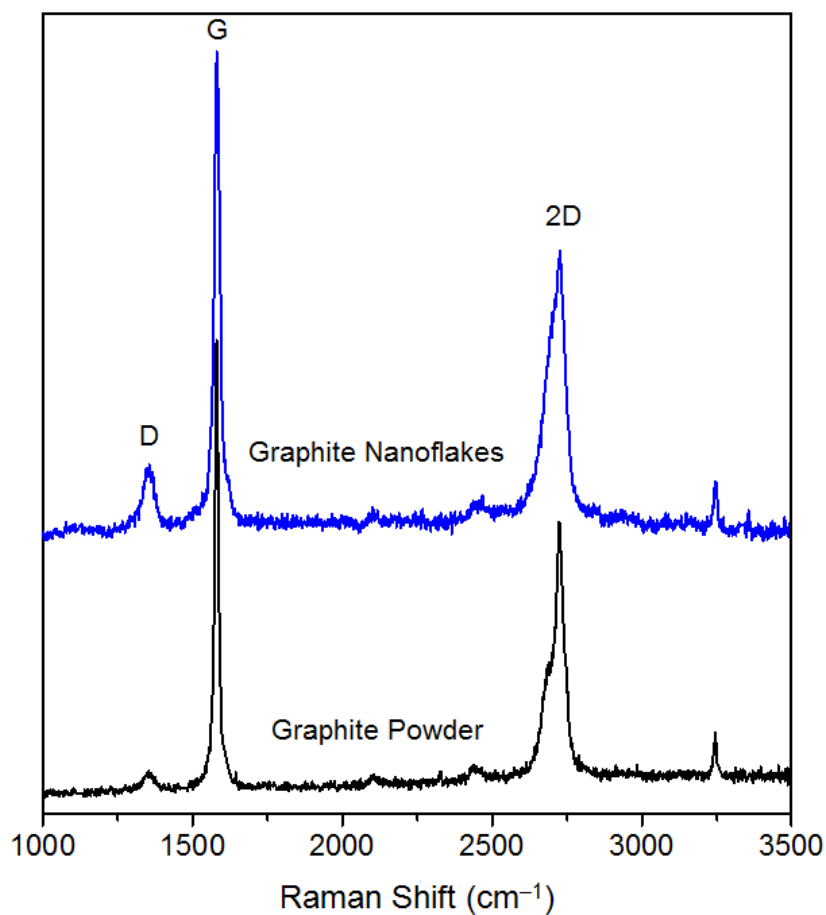

**Fig. S11.** Raman spectra of graphite powder and graphite nanoflakes.

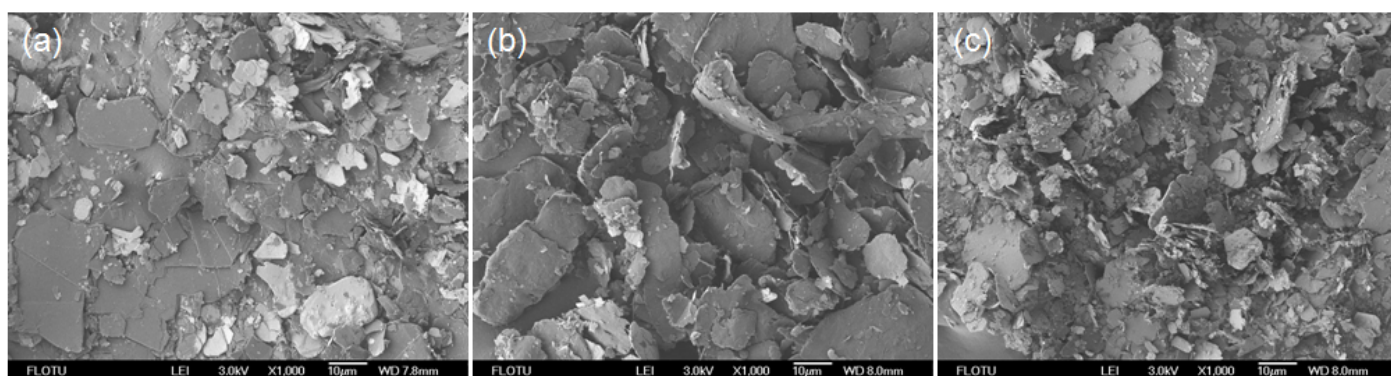

**Fig. S12.** SEM images of (a) graphite, (b) MoS<sub>2</sub> and (c) WS<sub>2</sub> nanoflakes.

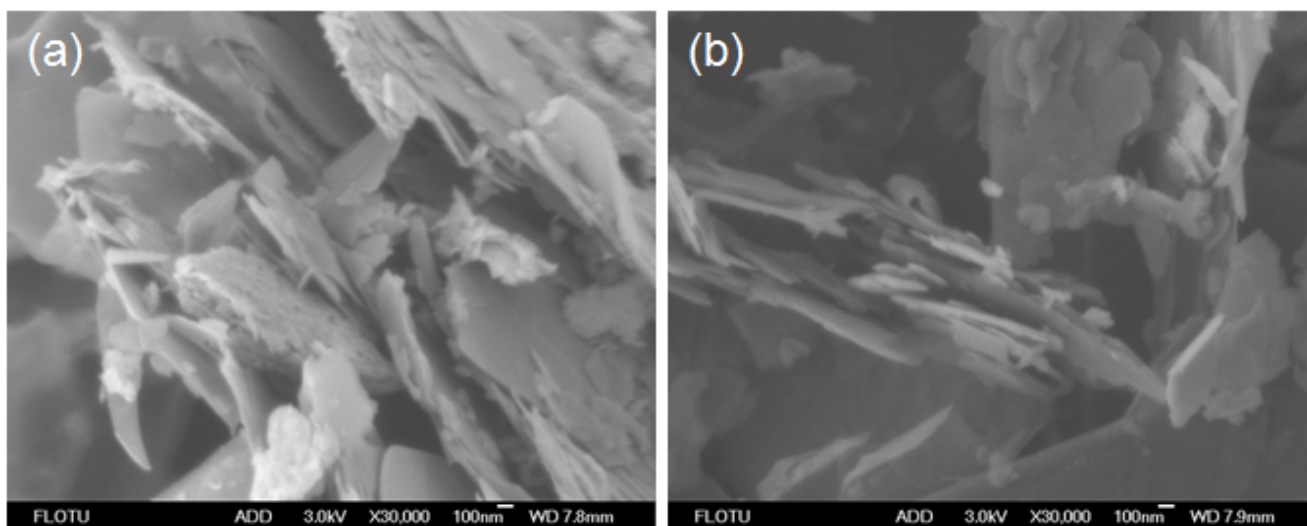

**Fig. S13.** High-magnification SEM images of (a) MoS<sub>2</sub>/graphite and (b) WS<sub>2</sub>/graphite nanoflake composites at a wt ratio of 50/50.

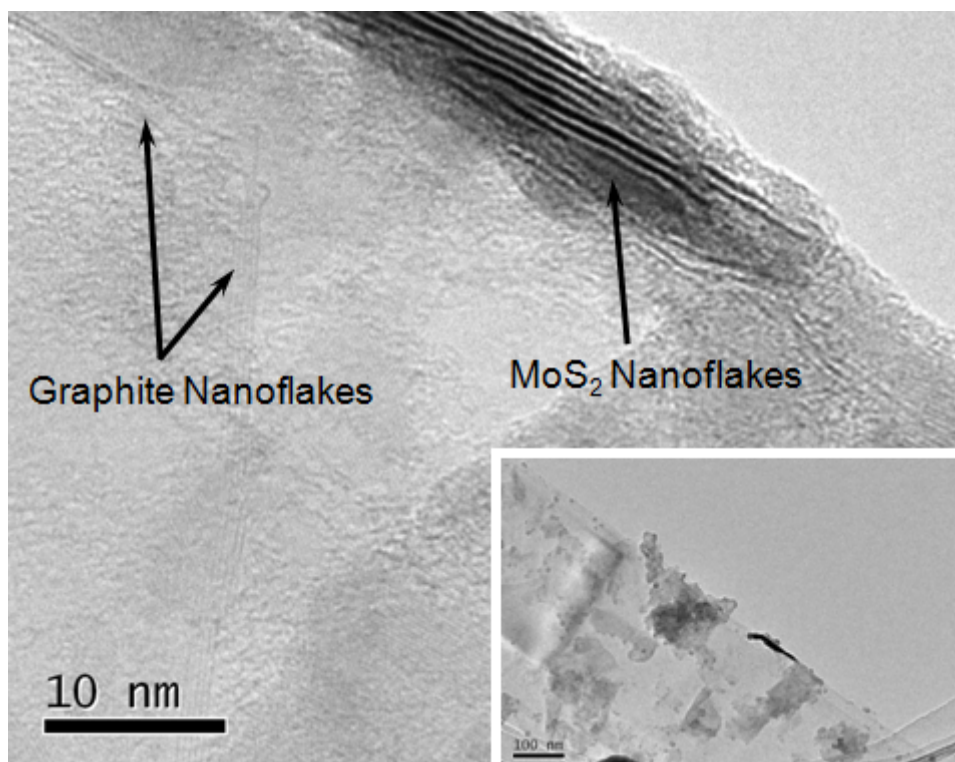

**Fig. S14.** HRTEM image of MoS<sub>2</sub>/graphite nanoflake composite at a wt ratio of 50/50. The insert is the corresponding low-magnification TEM image. In the HRTEM image we can see that the MoS<sub>2</sub> and graphite nanoflakes are mixed uniformly, and their edges can be clearly distinguished.



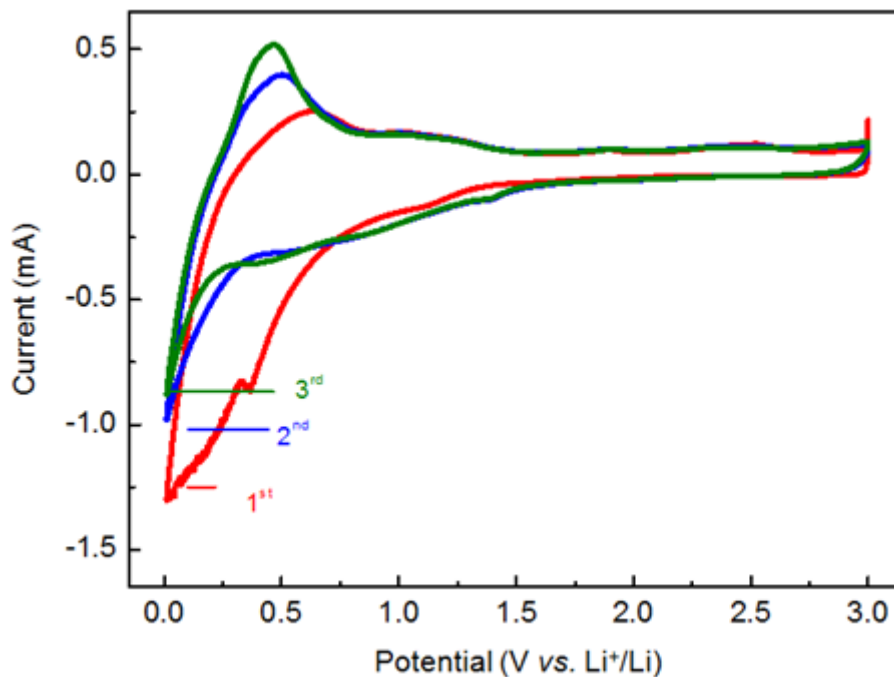

**Fig. S15.** CV (scan rate = 0.1 mV s<sup>-1</sup>) curves of graphite nanoflakes.

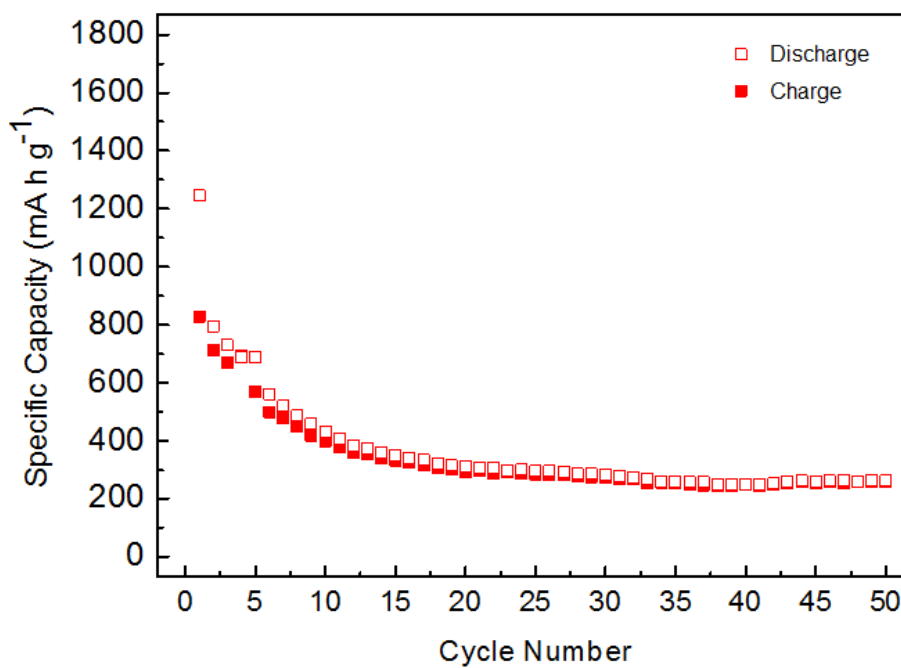

**Fig. S16.** Cycle behaviour (current density = 100 mA g<sup>-1</sup>) of graphite nanoflakes.

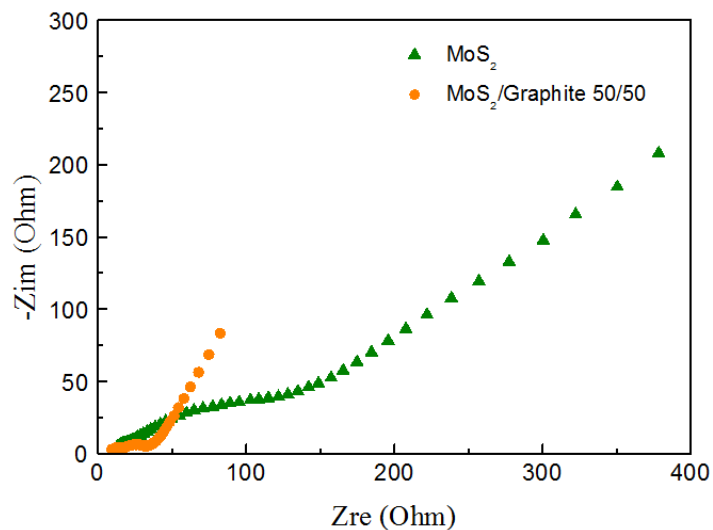

| Electrode                        | $R_{\Omega}$ ( $\Omega$ ) | $R_f$ ( $\Omega$ ) | $R_{ct}$ ( $\Omega$ ) |
|----------------------------------|---------------------------|--------------------|-----------------------|
| MoS <sub>2</sub> /Graphite 50/50 | 7.0                       | 9.7                | 15.5                  |
| MoS <sub>2</sub> Nanoflakes      | 9.0                       | 16.5               | 57.1                  |

**Fig. S17.** Nyquist plots of MoS<sub>2</sub> nanoflakes and MoS<sub>2</sub>/graphite nanoflake composites at a wt ratio of 50/50.

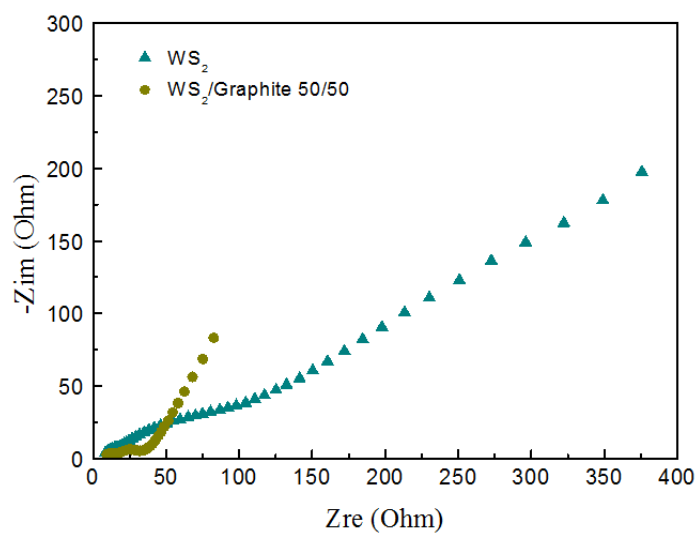

| Electrode                       | $R_{\Omega}$ ( $\Omega$ ) | $R_f$ ( $\Omega$ ) | $R_{ct}$ ( $\Omega$ ) |
|---------------------------------|---------------------------|--------------------|-----------------------|
| WS <sub>2</sub> /Graphite 50/50 | 8.1                       | 18.1               | 13.6                  |
| MoS <sub>2</sub> Nanoflakes     | 12.6                      | 20.2               | 109.2                 |

**Fig. S18.** Nyquist plots of WS<sub>2</sub> nanoflakes and WS<sub>2</sub>/graphite nanoflake composites at a wt ratio of 50/50.
